# Supplementary material for: Microbiota-driven transcriptional changes in prefrontal cortex override genetic differences in social behavior
Source: eLife journal article supplement (doi:10.7554/elife.13442), 2016-04-20
Supplement: supp [file elife-13442-supp-v1.zip]

Archive with 11 entries (11 files):
- elife_poa_e13442_Figure_3_figure_supplement_1.pdf
- elife_poa_e13442_Figure_4_figure_supplement_1.pdf
- elife_poa_e13442_Figure_1_figure_supplement_2.pdf
- elife_poa_e13442_Figure_6_figure_supplement_1.pdf
- elife_poa_e13442_Figure_6_figure_supplement_3.pdf
- elife_poa_e13442_Figure_1_figure_supplement_3.pdf
- elife_poa_e13442_Figure_5_figure_supplement_1.pdf
- elife_poa_e13442_Figure_1_figure_supplement_1.pdf
- elife_poa_e13442_Figure_4_figure_supplement_2.pdf
- elife_poa_e13442_Figure_6_figure_supplement_2.pdf
- elife_poa_e13442_Figure_2_figure_supplement_1.pdf
