# Supplementary material for: Microbiota-driven transcriptional changes in prefrontal cortex override genetic differences in social behavior
Source: eLife journal article supplement (doi:10.7554/elife.13442), 2016-04-20

A

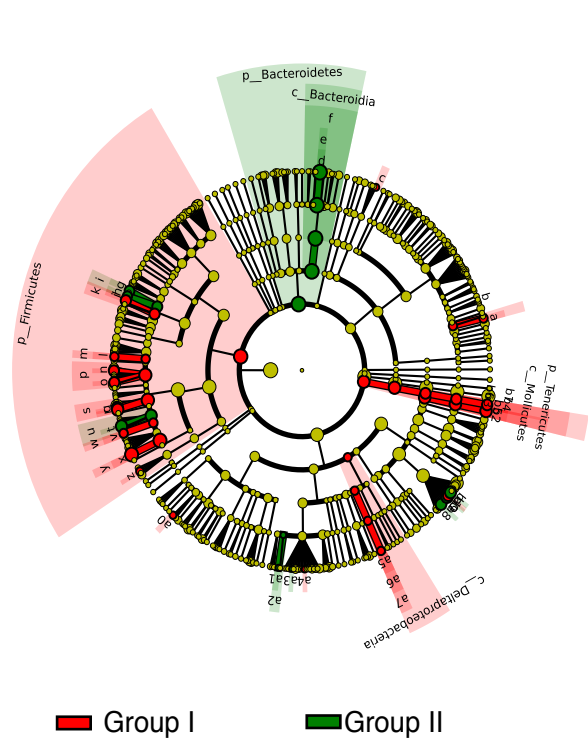

- a: g\_Brachybacterium
- b: f\_Dermabacteraceae
- c: g\_Adlercreutzia
- d: g\_nid\_S24\_7
- e: f\_S24\_7
- f: o\_Bacteroidales
- g: g\_Enterococcus
- h: g\_nid\_Enterococcaceae
- i: f\_Enterococcaceae
- j: g\_Lactobacillus
- k: f\_Lactobacillaceae
- l: g\_Dehalobacterium
- m: f\_Dehalobacteriaceae
- n: g\_Coprococcus
- o: g\_Ruminococcus
- p: f\_Lachnospiraceae
- q: g\_Ruminococcus
- r: g\_nid\_Ruminococcaceae
- s: f\_Ruminococcaceae
- t: g\_Sporomusa
- u: f\_Veillonellaceae
- v: g\_nid\_Mogibacteriaceae
- w: f\_Mogibacteriaceae
- x: g\_nid\_Clostridiales
- y: f\_nid\_Clostridiales
- z: g\_Coprobacillus
- a0: g\_Balneimonas
- a1: g\_Burkholderia
- a2: f\_Burkholderiaceae
- a3: g\_Delftia
- a4: g\_Polaromonas
- a5: g\_nid\_Bacteriovoracaceae
- a6: f\_Bacteriovoracaceae
- a7: o\_Bdellovibrionales
- a8: g\_Enterobacter
- a9: g\_Pantoea
- b0: g\_Proteus
- b1: g\_Salmonella
- b2: g\_Anaeroplasmata
- b3: f\_Anaeroplasmataceae
- b4: o\_Anaeroplasmatales
- b5: g\_nid\_RF39
- b6: f\_nid\_RF39
- b7: o\_RF39

B

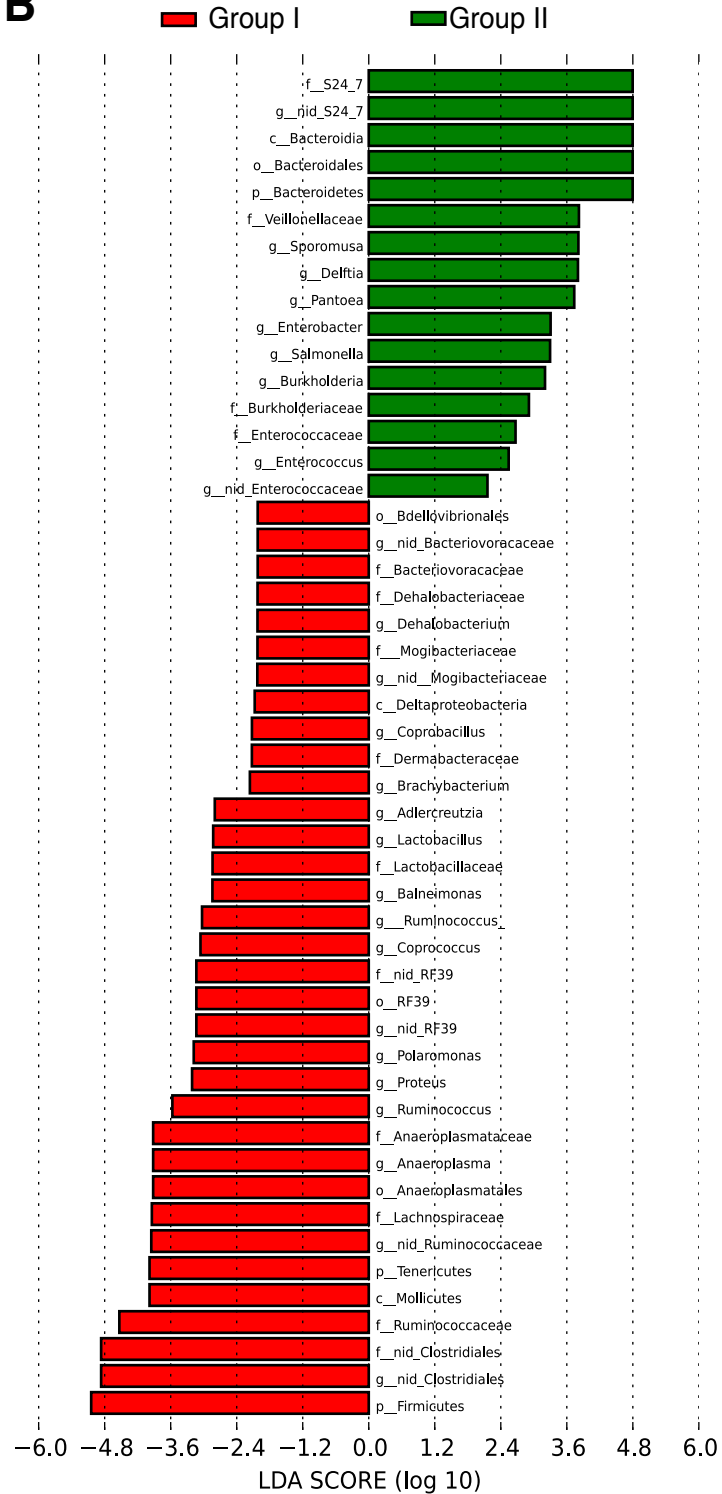

Supplement: supp [file elife-13442-supp-v1.zip › elife_poa_e13442_Figure_6_figure_supplement_1.pdf]
