# Supplementary figures and images for: Microbiota-driven transcriptional changes in prefrontal cortex override genetic differences in social behavior
Source: eLife journal article supplement (doi:10.7554/elife.13442), 2016-04-20

A

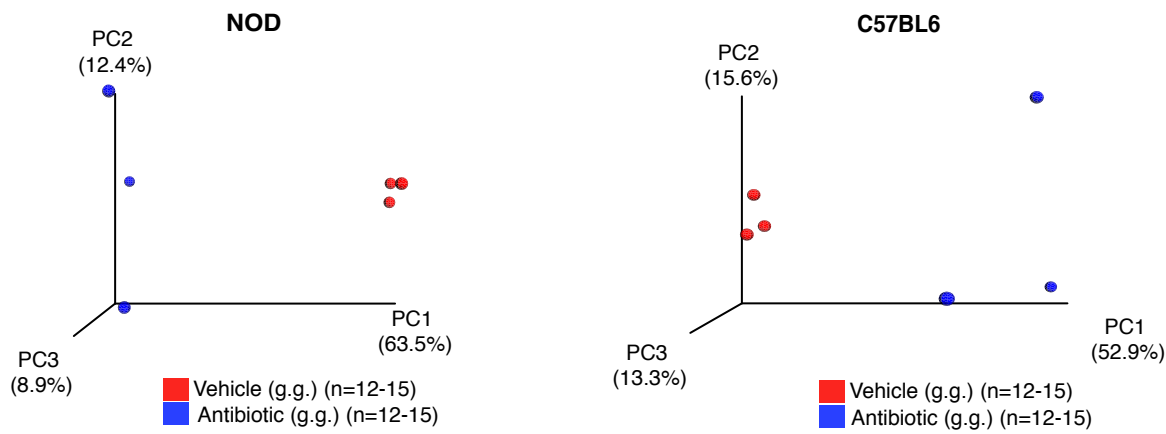

B

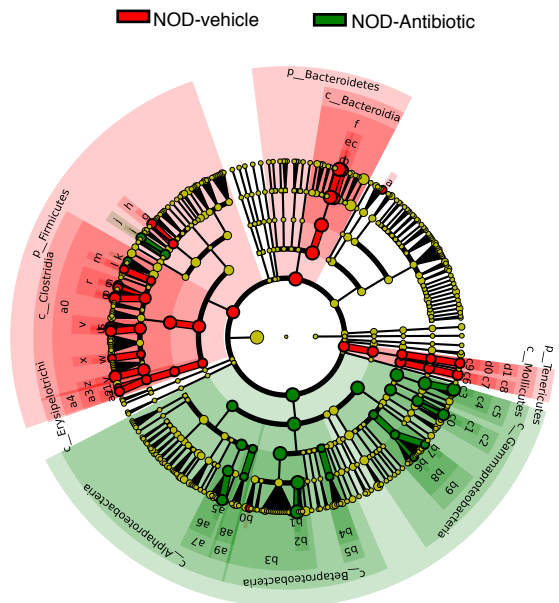

C

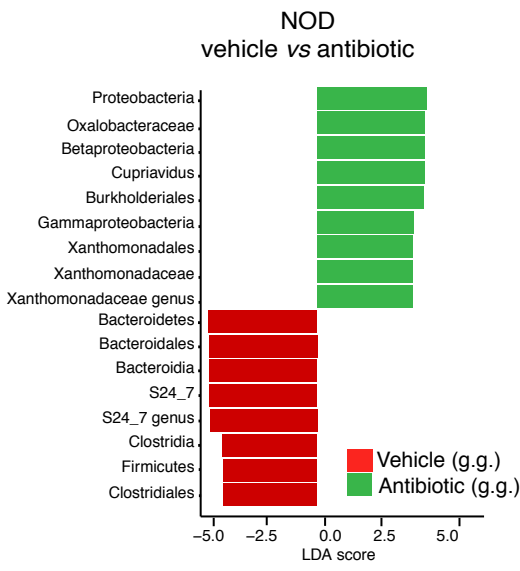

D

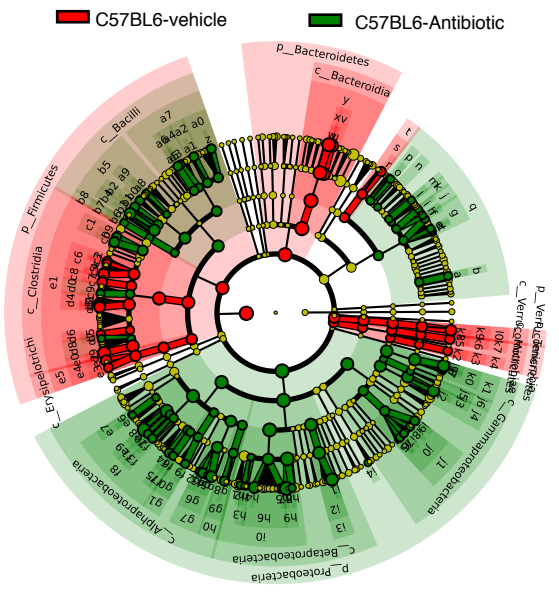

E

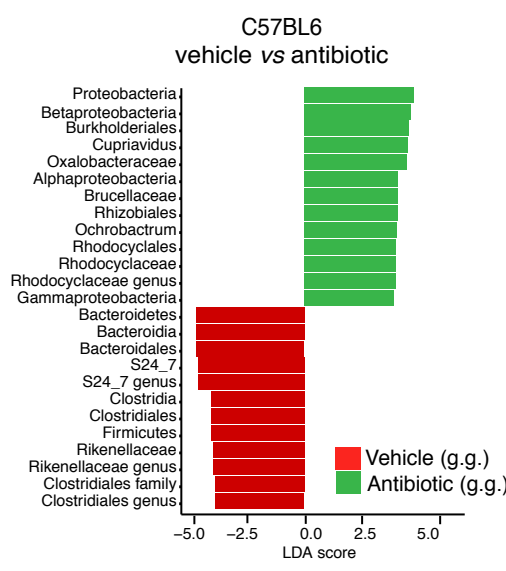

Supplement: supp [file elife-13442-supp-v1.zip › elife_poa_e13442_Figure_3_figure_supplement_1.pdf]

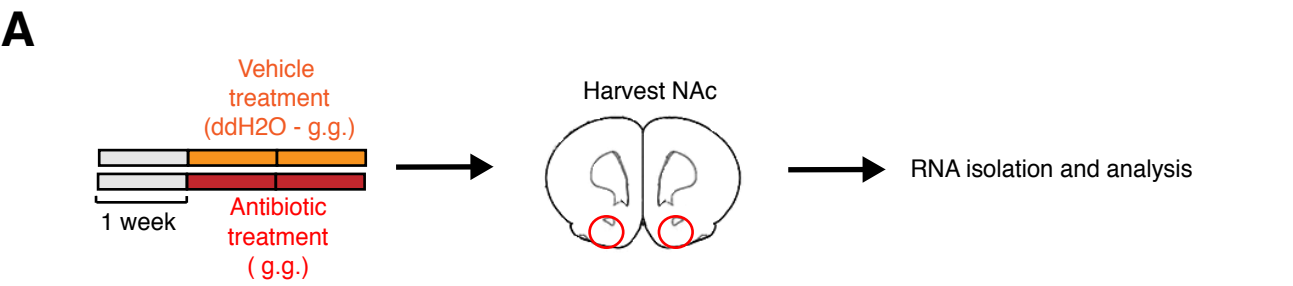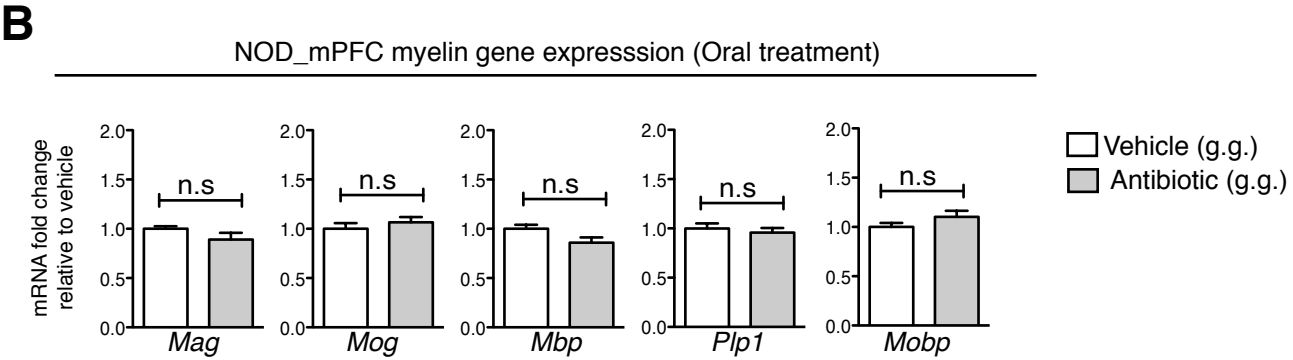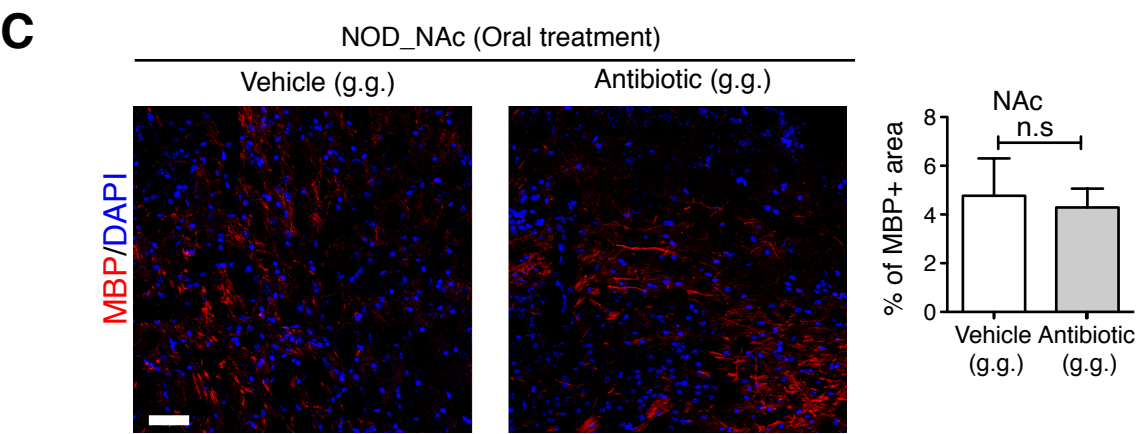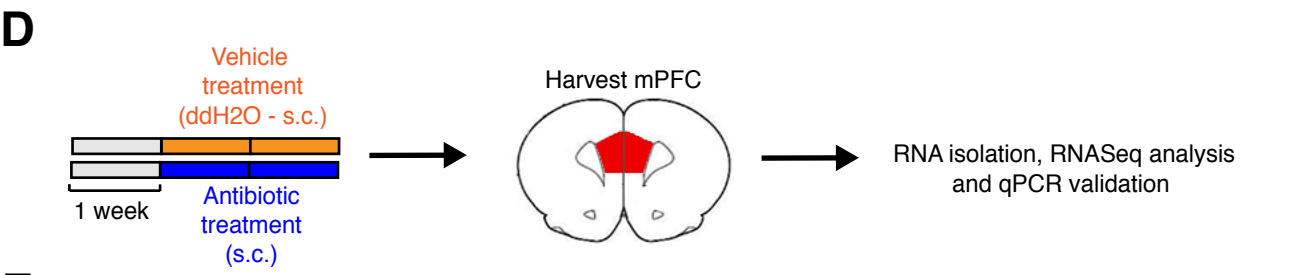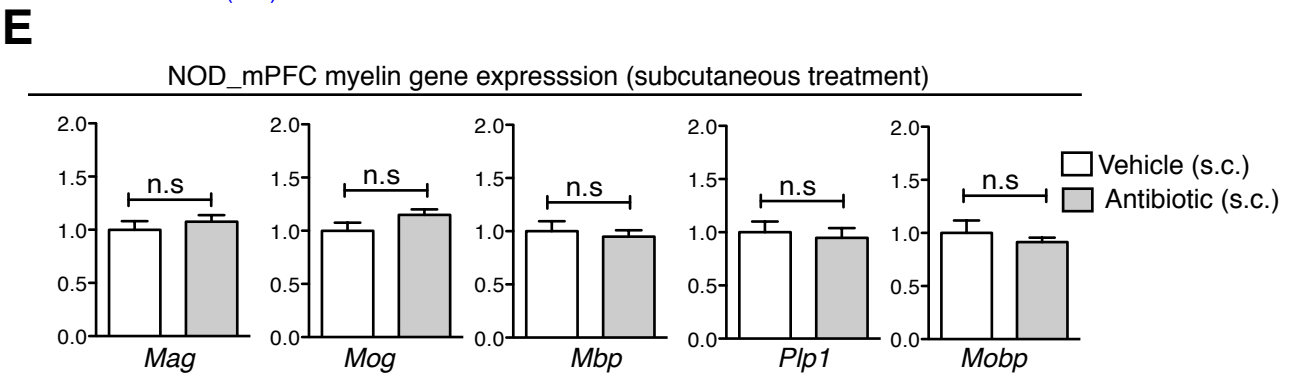

Supplement: supp [file elife-13442-supp-v1.zip › elife_poa_e13442_Figure_4_figure_supplement_1.pdf]

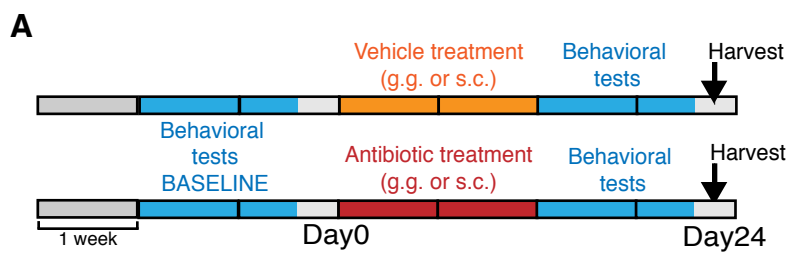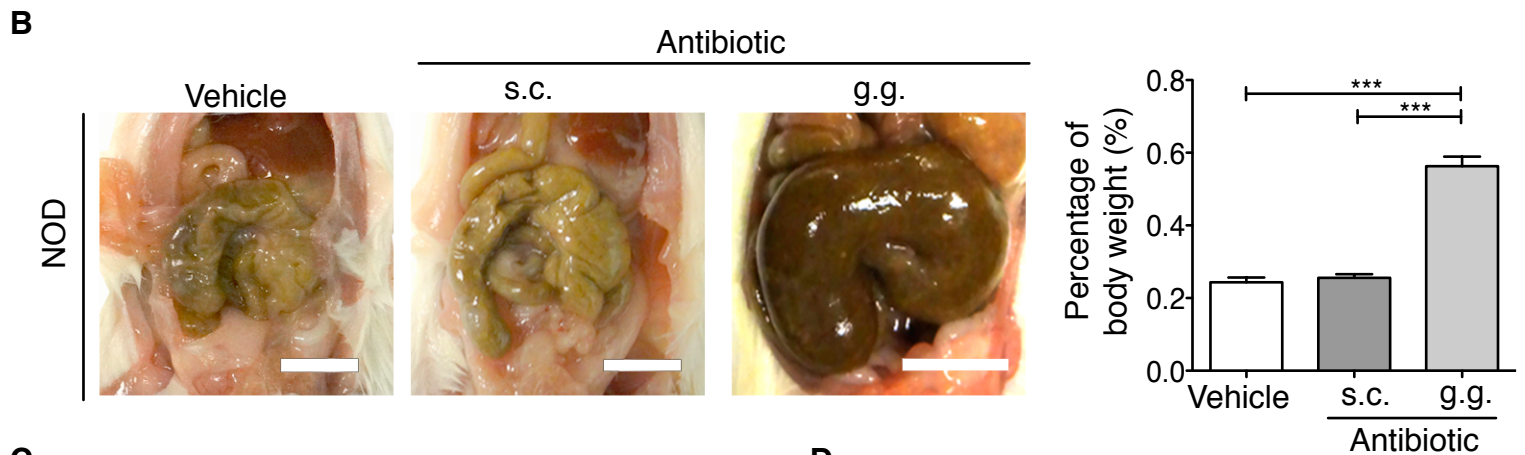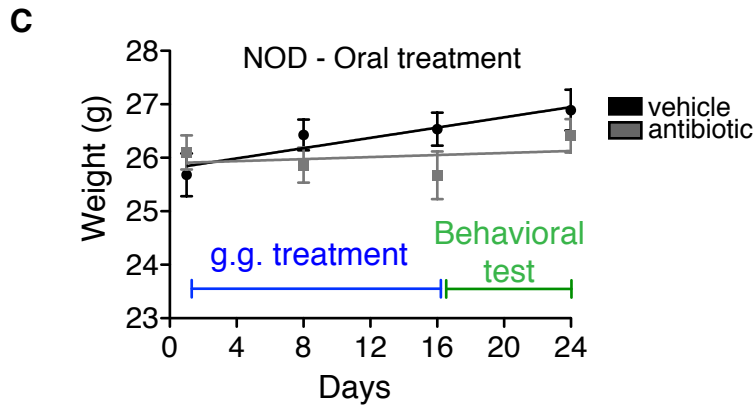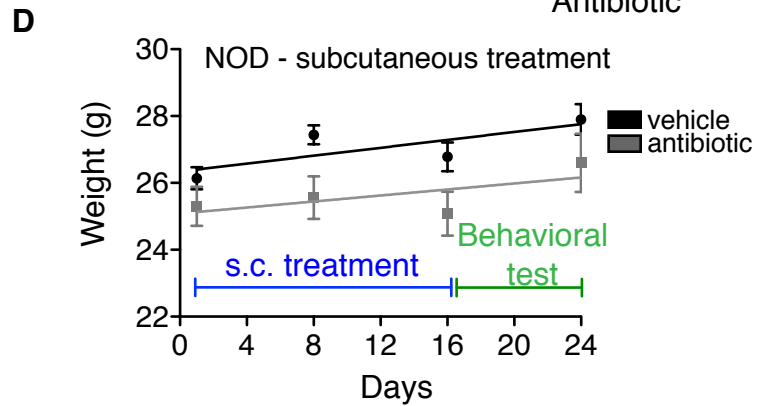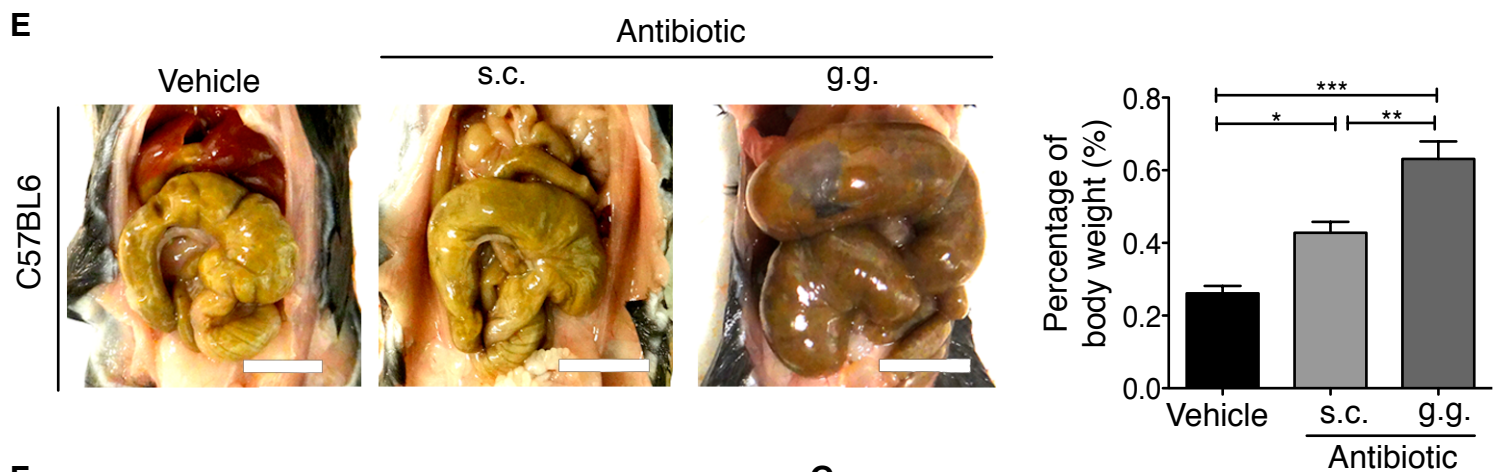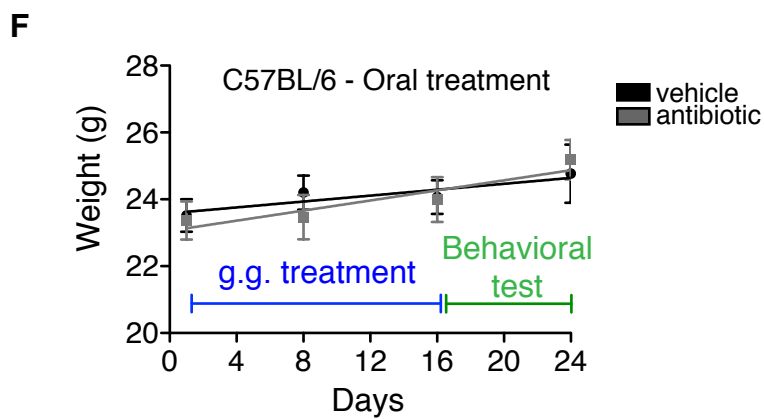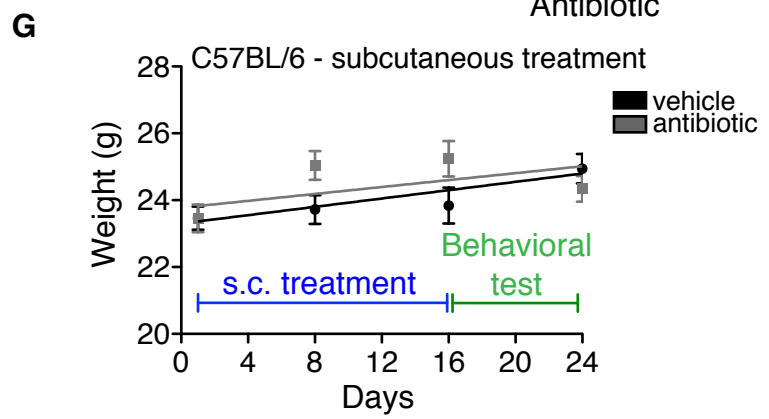

Supplement: supp [file elife-13442-supp-v1.zip › elife_poa_e13442_Figure_1_figure_supplement_2.pdf]

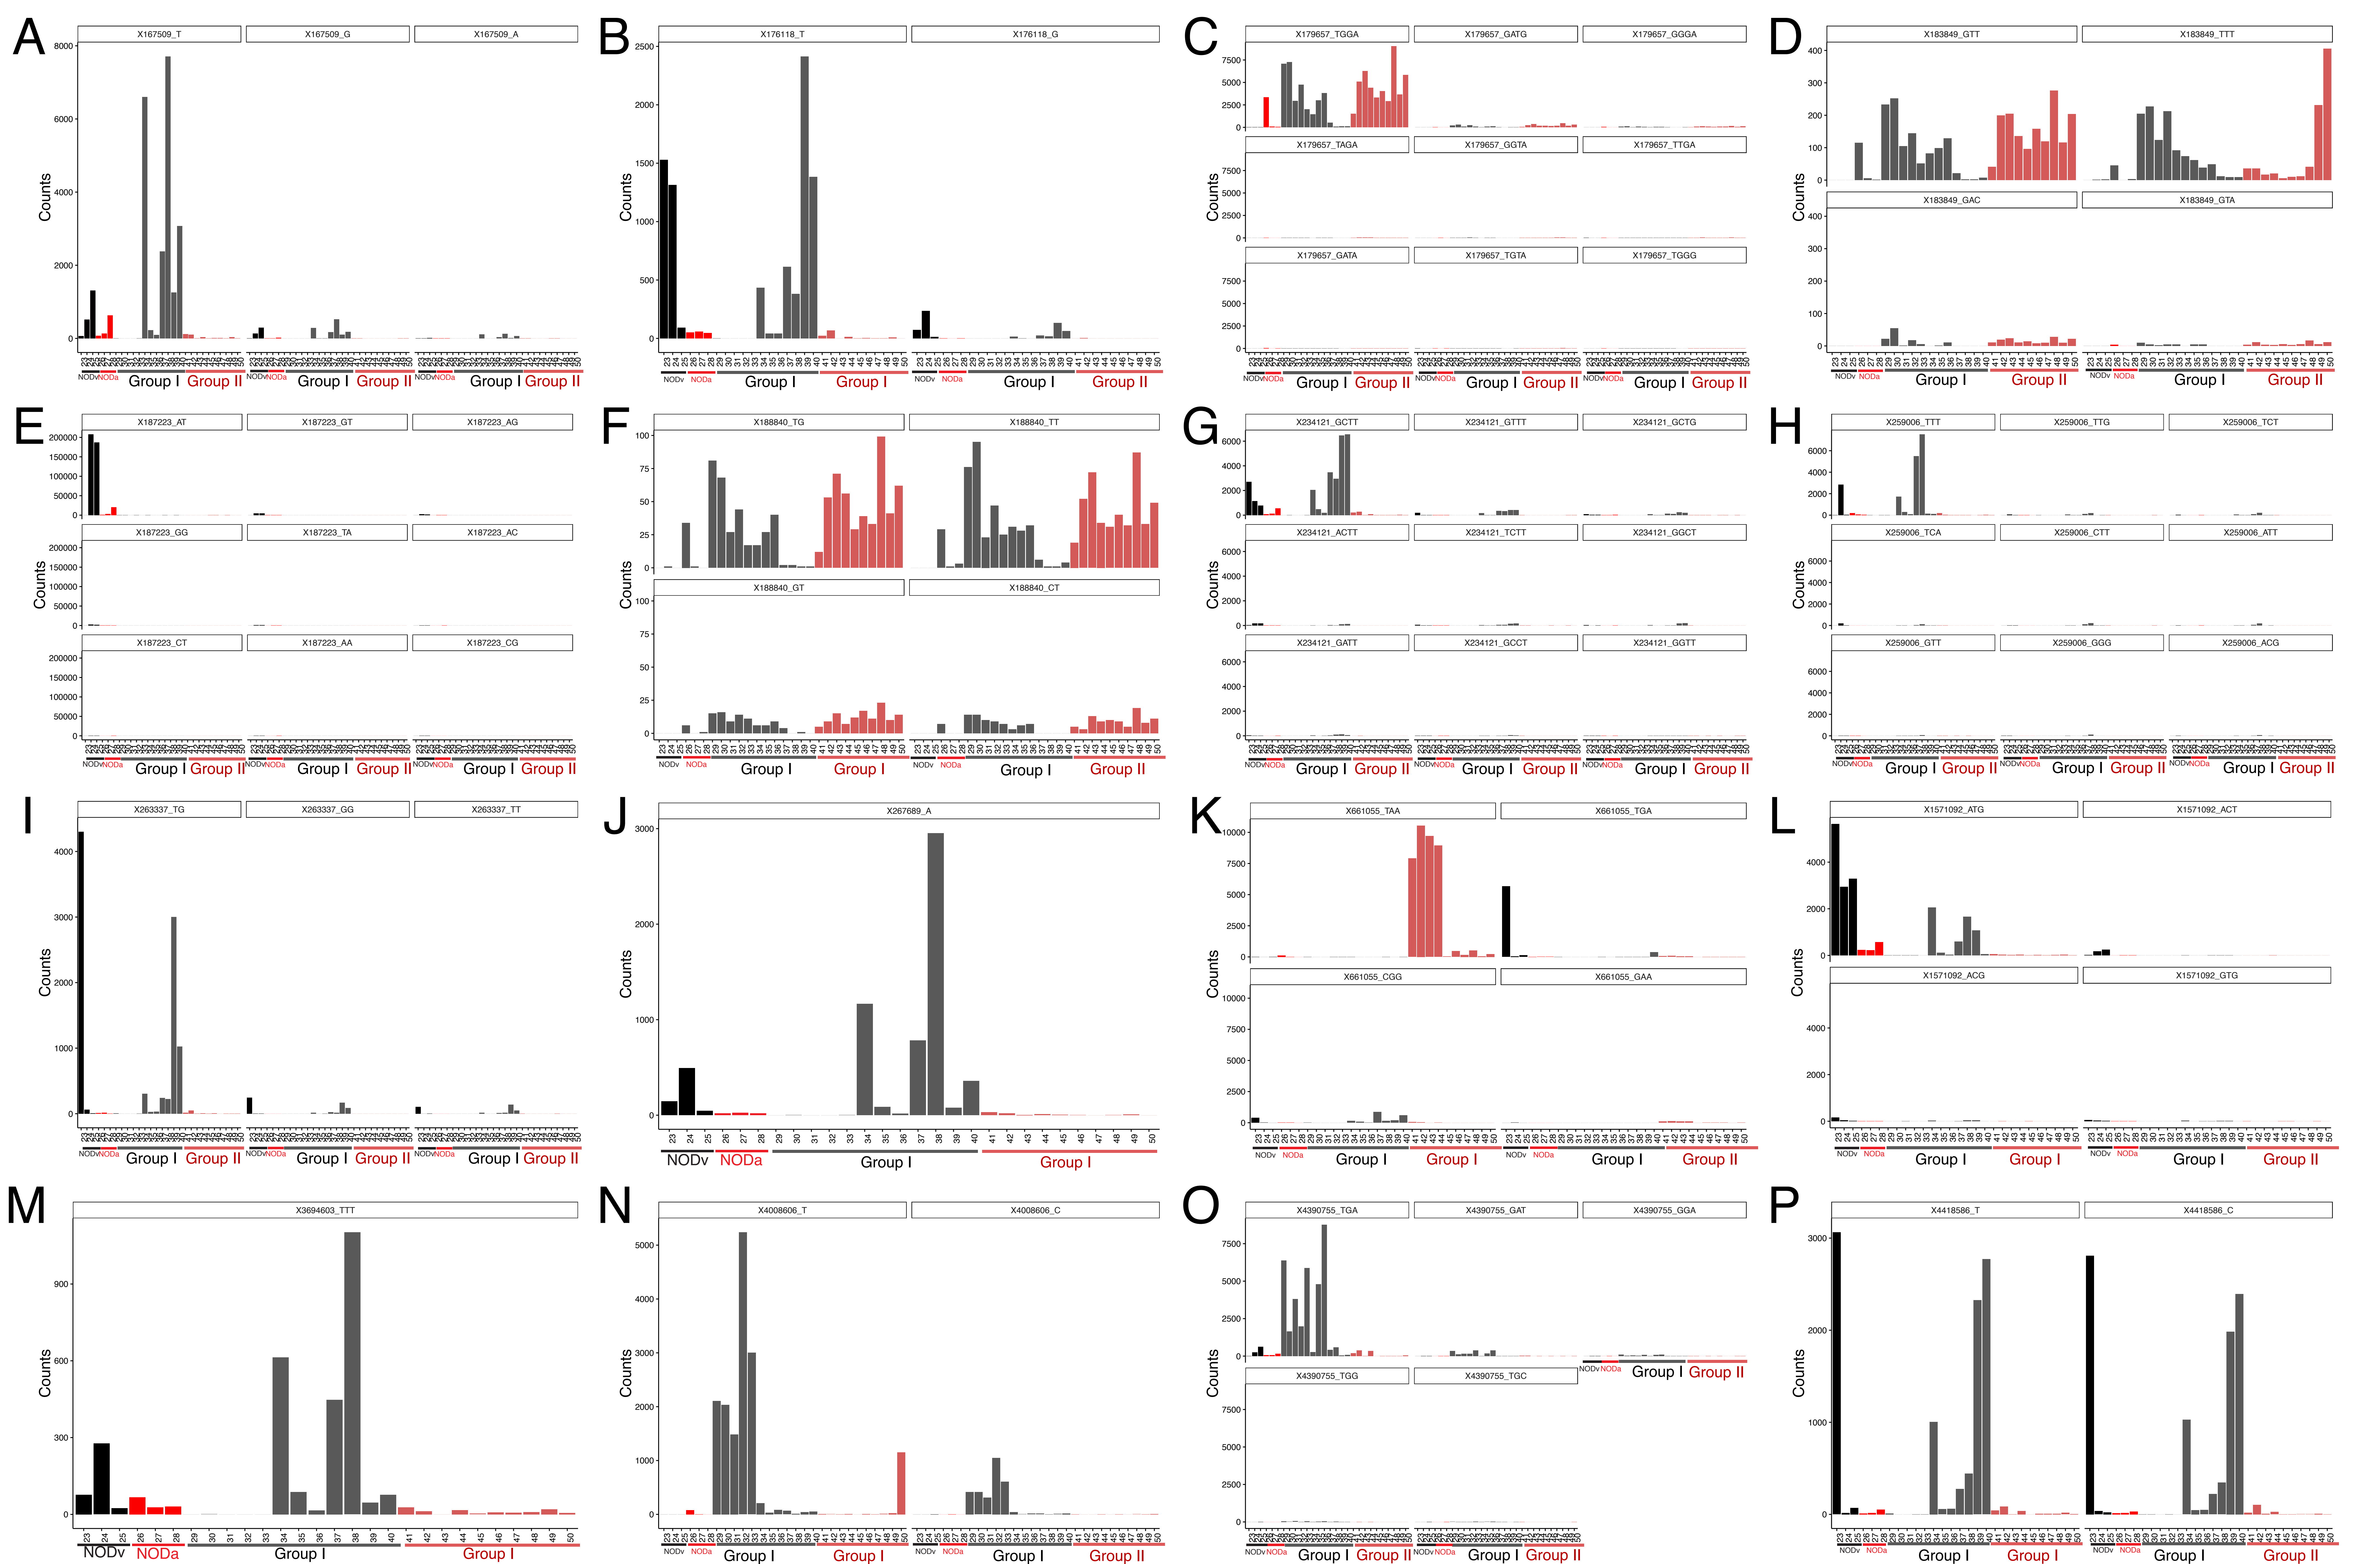

Supplement: supp [file elife-13442-supp-v1.zip › elife_poa_e13442_Figure_6_figure_supplement_3.pdf]

A

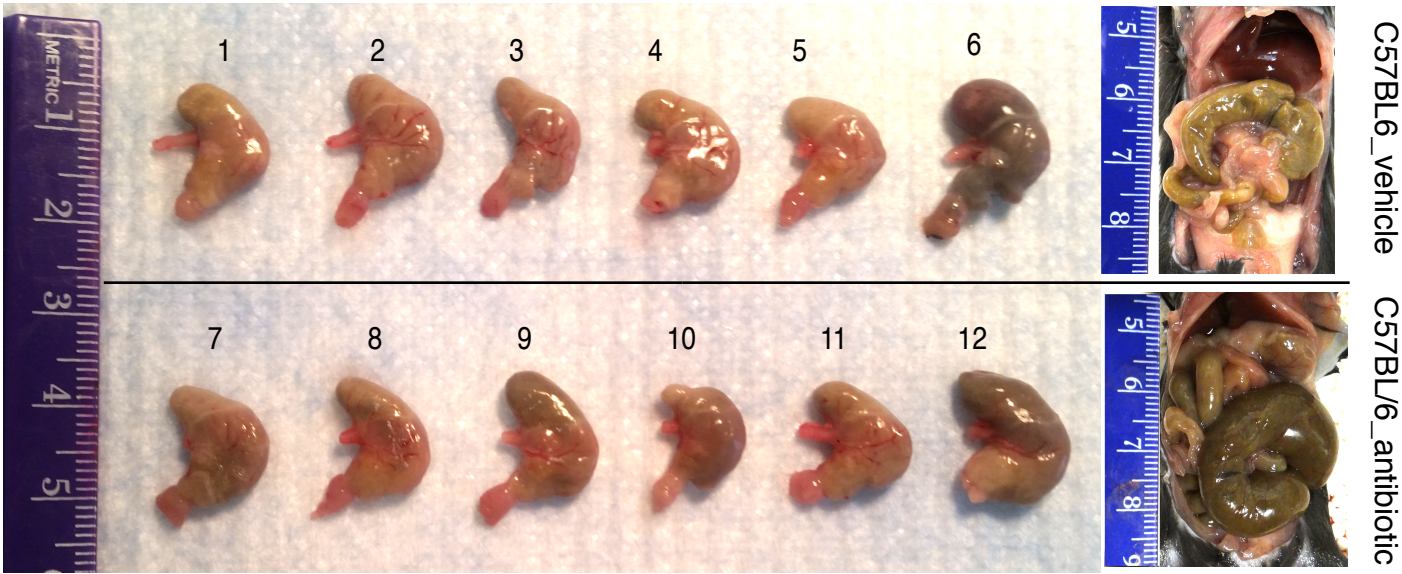

B

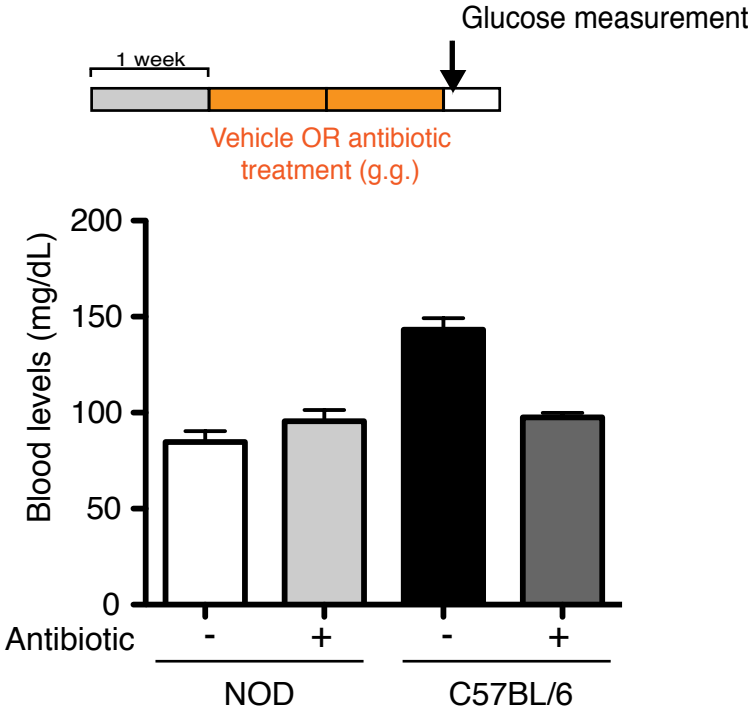

Supplement: supp [file elife-13442-supp-v1.zip › elife_poa_e13442_Figure_1_figure_supplement_3.pdf]

A

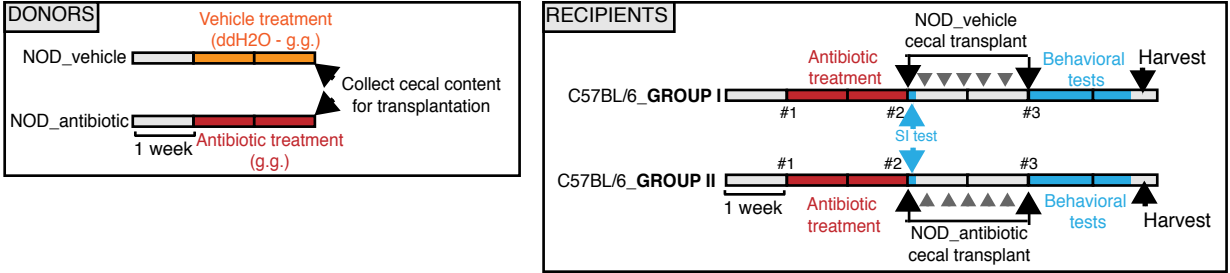

B

Forced swim test  
C57BL/6 - After transplantation

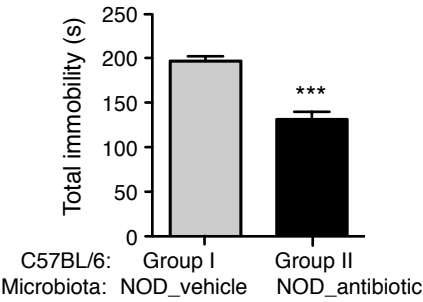

Supplement: supp [file elife-13442-supp-v1.zip › elife_poa_e13442_Figure_5_figure_supplement_1.pdf]

**A**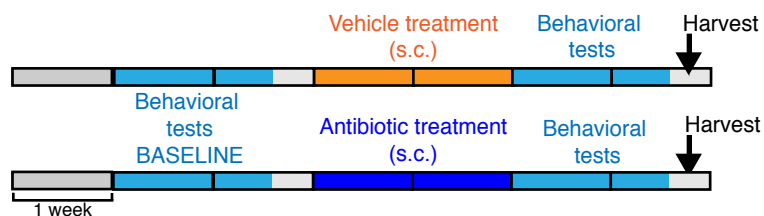**B**

NOD  
Social interaction test

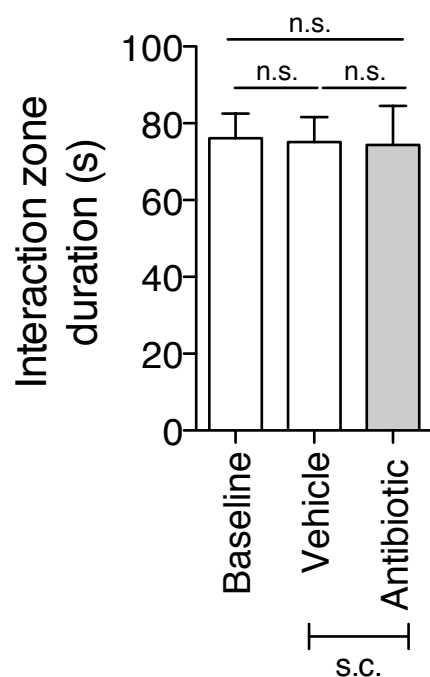**C**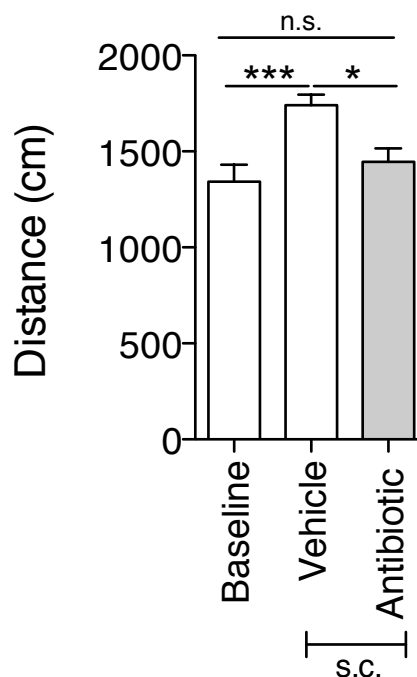**D**

C57BL/6  
Social interaction test

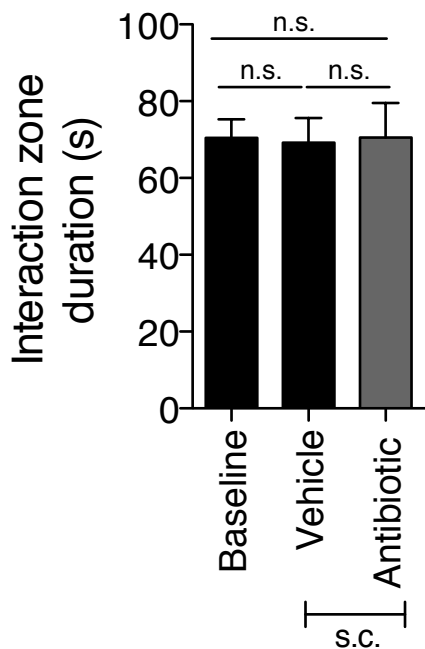**E**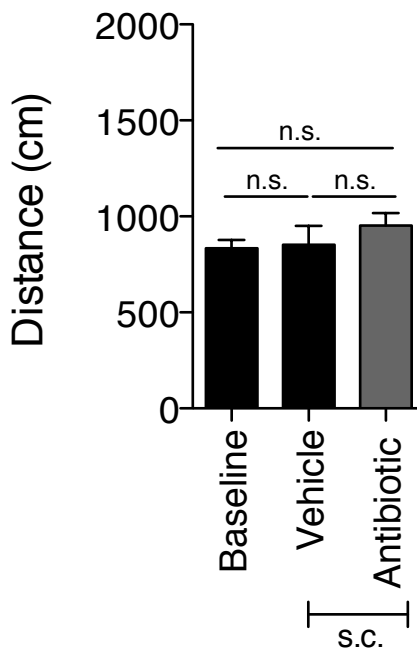

Supplement: supp [file elife-13442-supp-v1.zip › elife_poa_e13442_Figure_1_figure_supplement_1.pdf]

**A**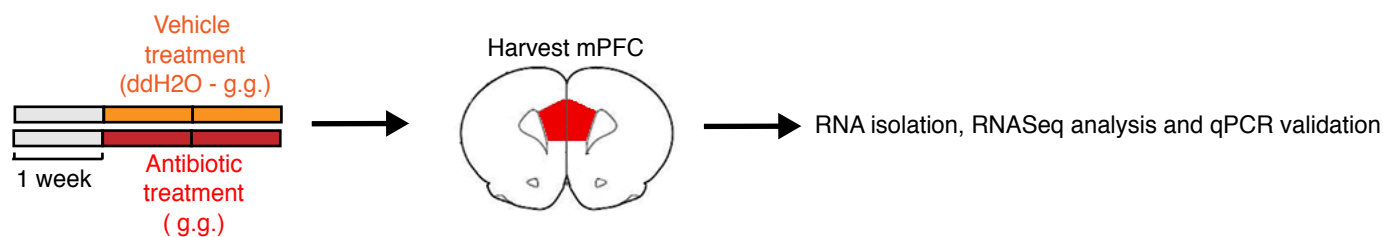**B**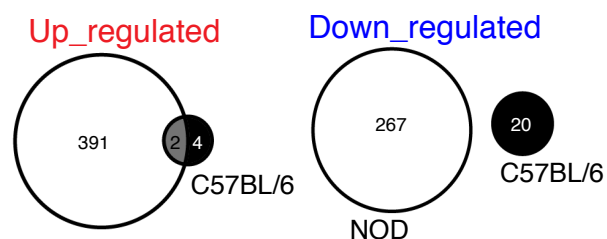**C**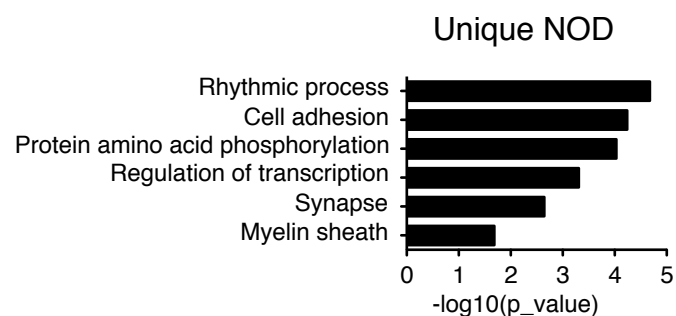**D**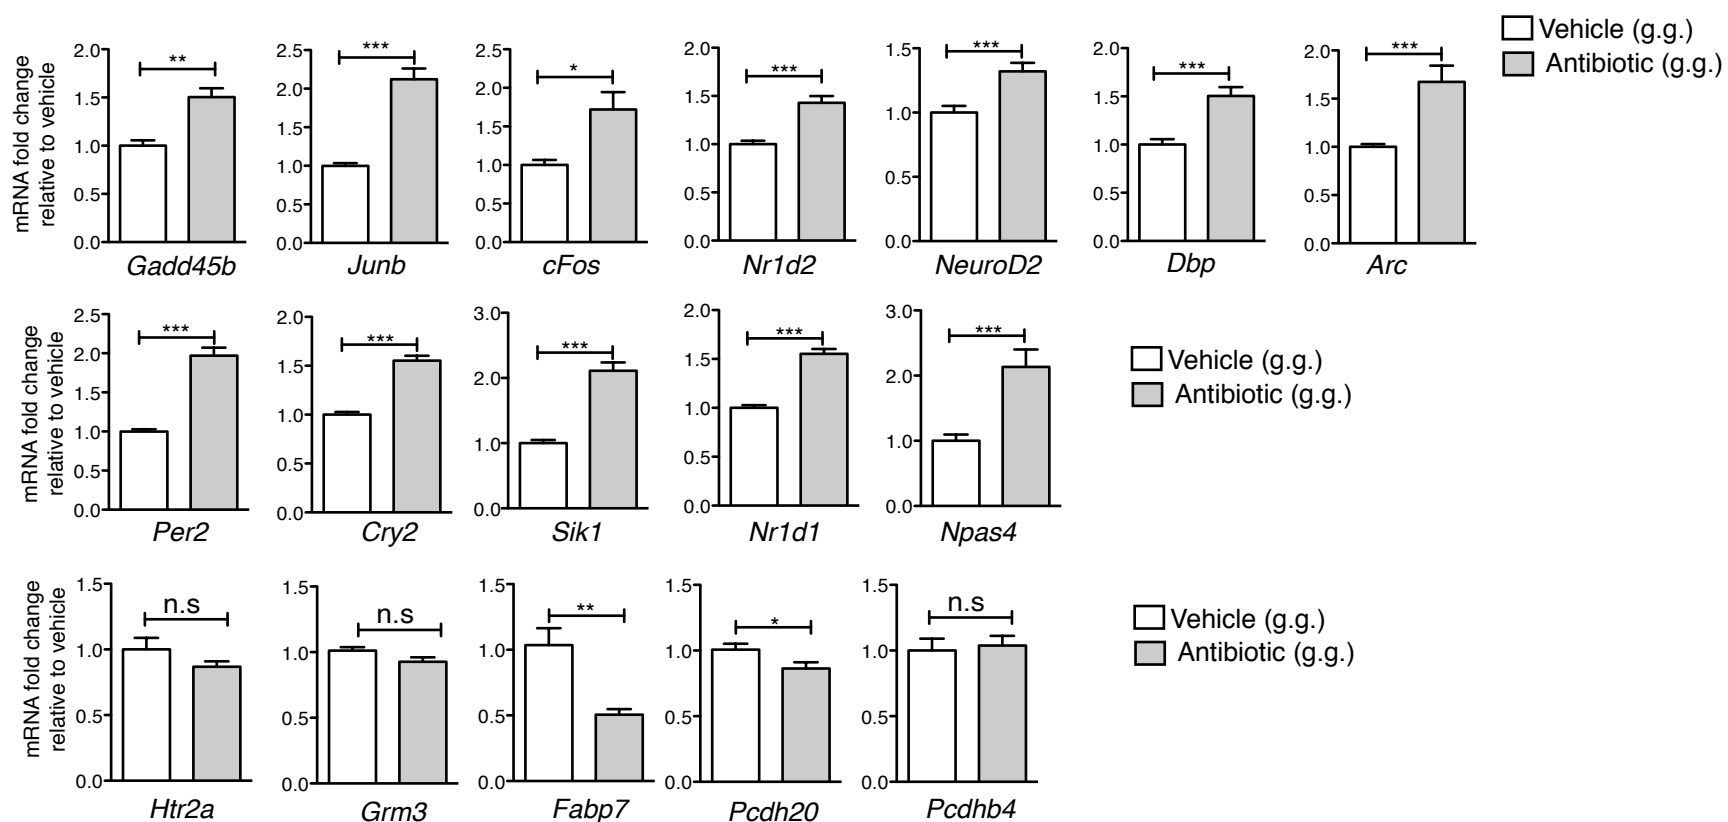

Supplement: supp [file elife-13442-supp-v1.zip › elife_poa_e13442_Figure_4_figure_supplement_2.pdf]

**A****SAMPLES**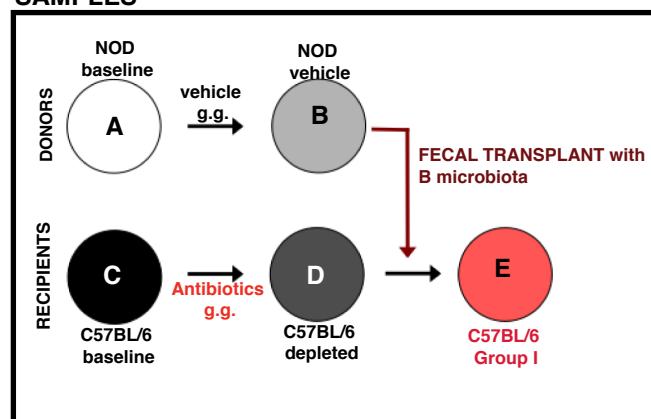**SHARED OTU ANALYSIS**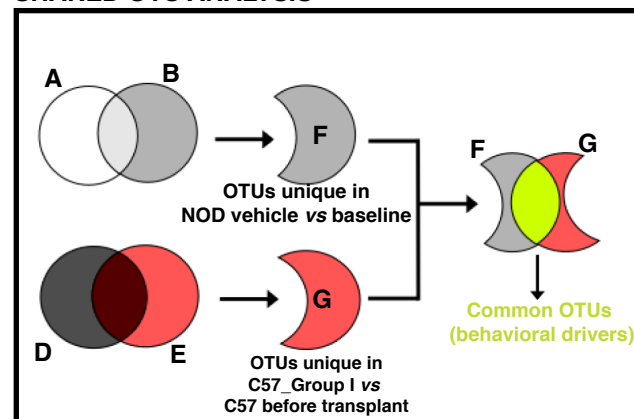**B**

Relative abundance in shared OTUs

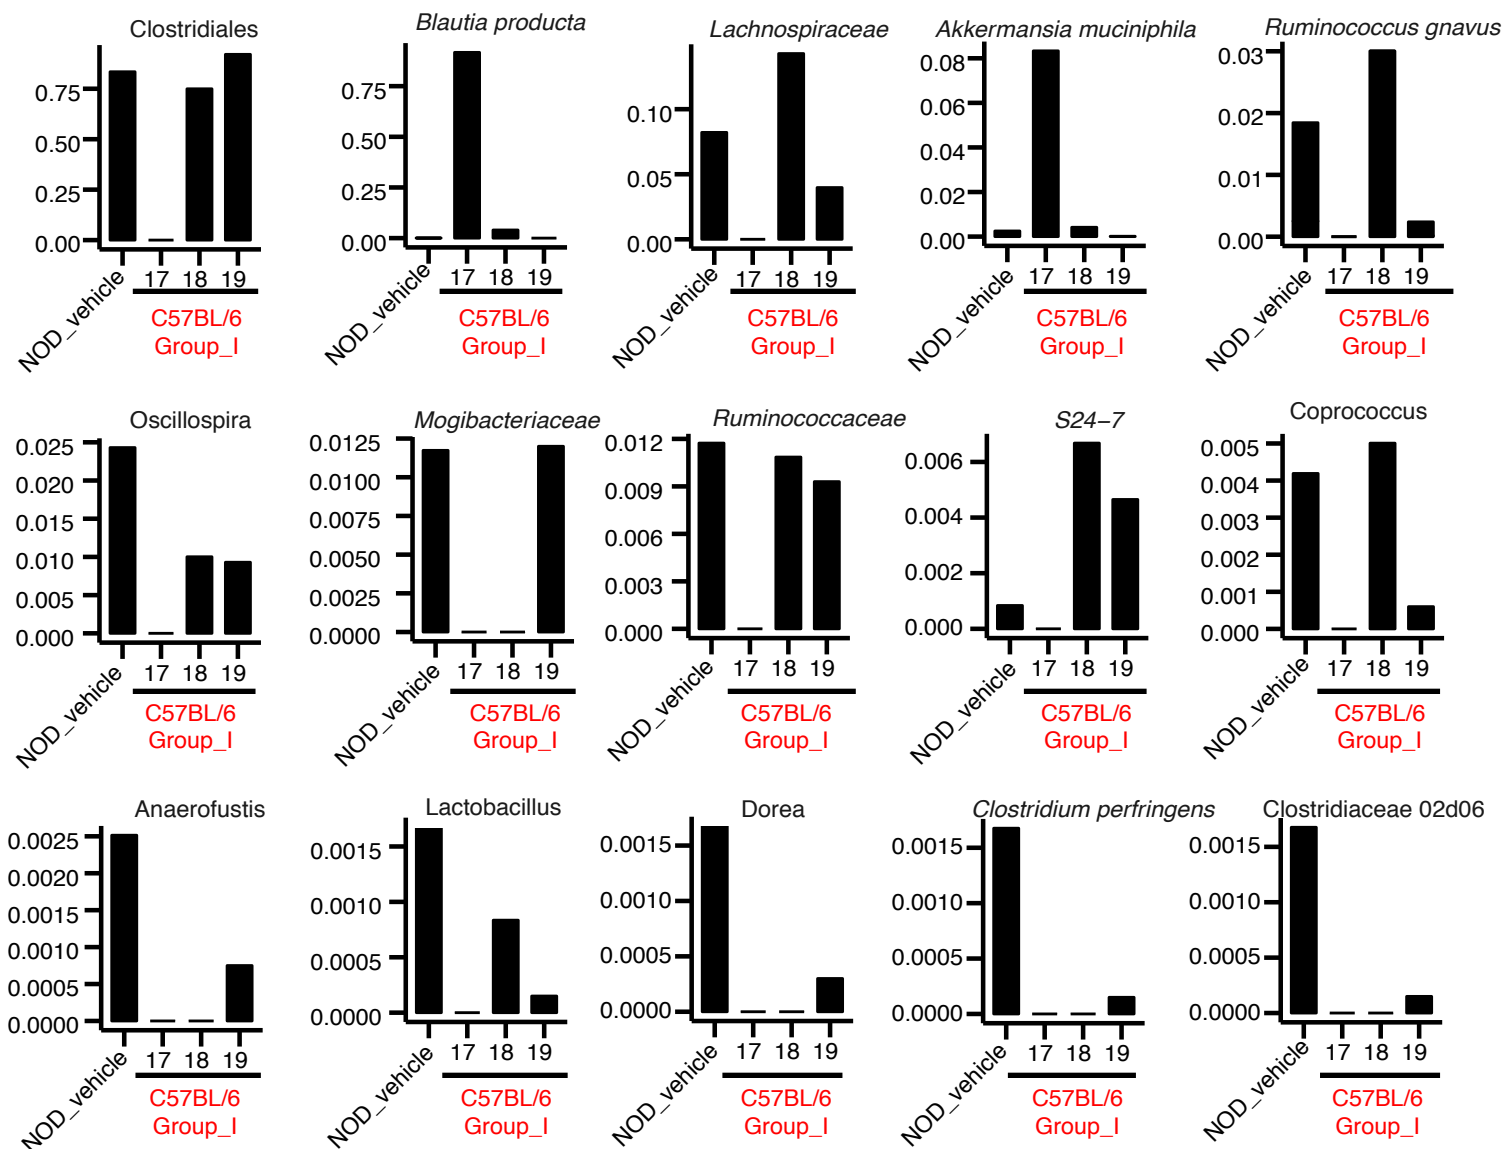**C**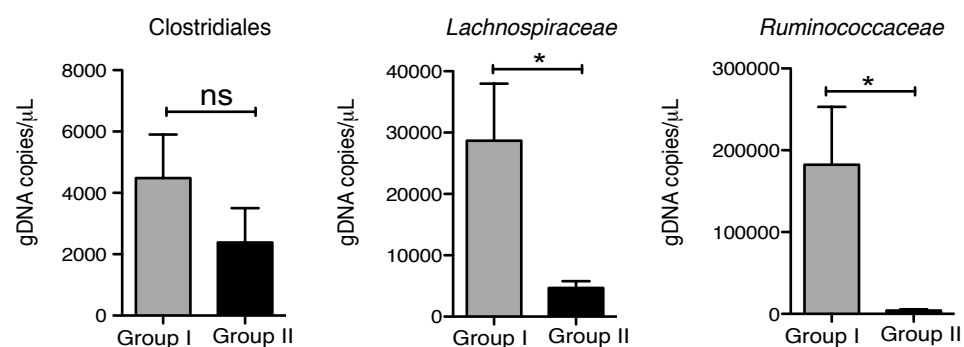

Supplement: supp [file elife-13442-supp-v1.zip › elife_poa_e13442_Figure_6_figure_supplement_2.pdf]

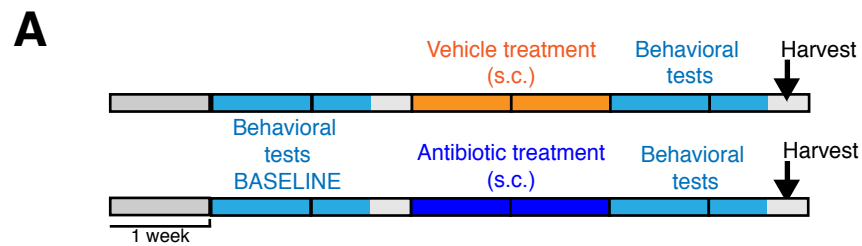

**B**

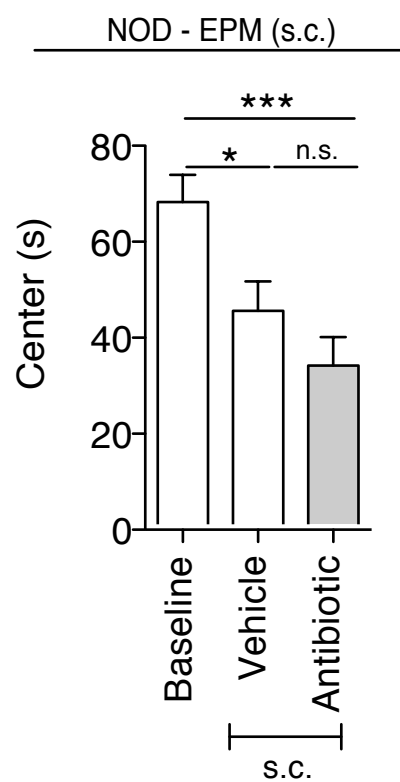

**C**

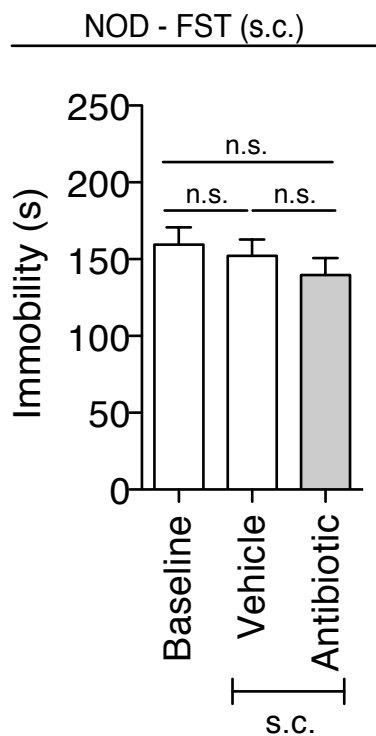

**D**

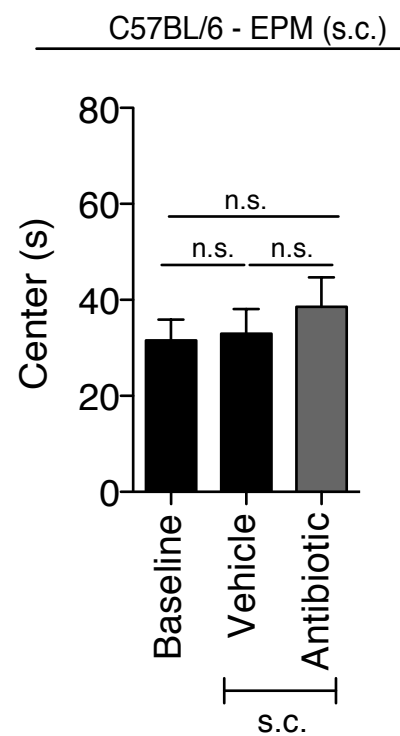

**E**

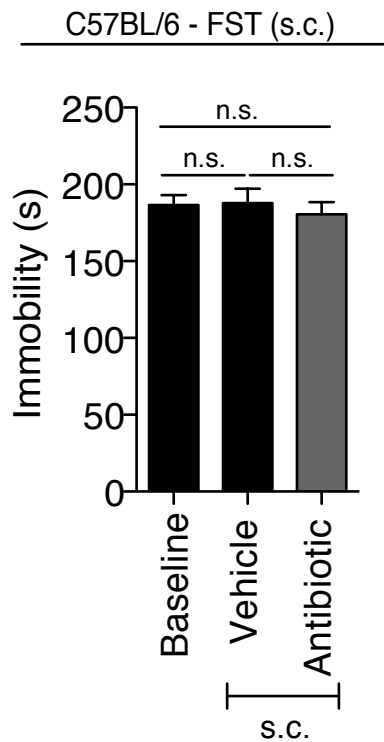

Supplement: supp [file elife-13442-supp-v1.zip › elife_poa_e13442_Figure_2_figure_supplement_1.pdf]

A

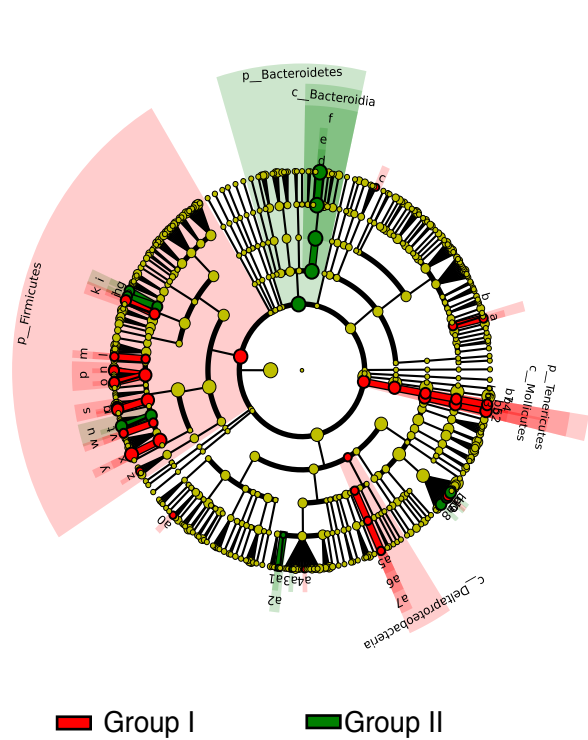

B

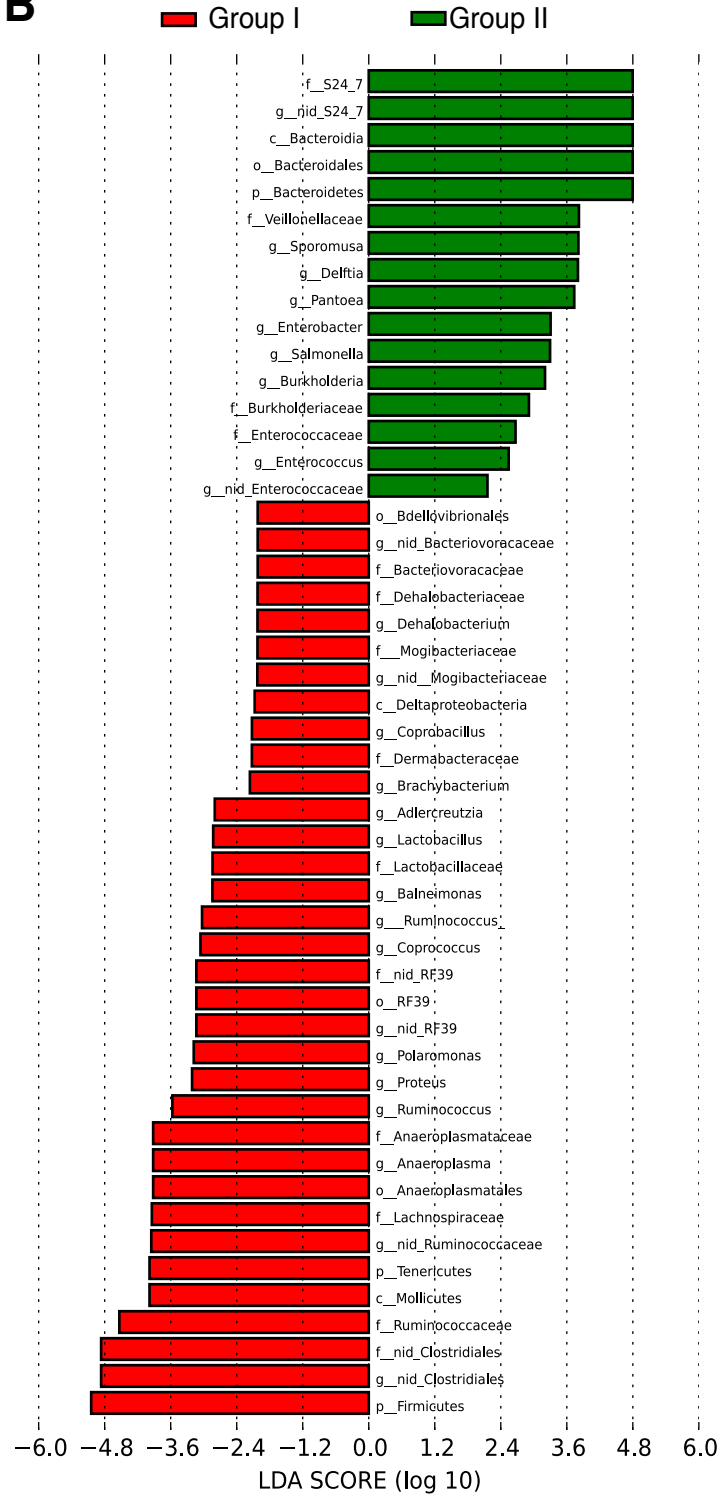

Supplement: supp [file elife_poa_e13442_Figure_6_figure_supplement_1.pdf › elife_poa_e13442_Figure_6_figure_supplement_1.pdf]
